# Supplementary material for: Economic value of trees in the estate of the Harewood House stately home in the United Kingdom
Source: PeerJ. 2018 Sep 14;6:e5411. doi: 10.7717/peerj.5411 (PMC6140670; doi:10.7717/peerj.5411)
Supplement: Supplemental Information 1 [file peerj-06-5411-s001.xlsx]

## Sheet: Notes
Data were collected at Harewood House Estate, UK, in August 2017 primarily by Joey Ting.
Field 1 refers to the North Front and Field 2 refers to the West Garden.
Tree number and ID tag are identifers for the trees that the Harewood House Estate team already used and have been included for cross referencing if needed.

## Sheet: Raw Data
Field	Number	Tree Number	ID tag	Species	GPS 1	GPS 2	DBH	Actual Distance	Angle to top	Angle to Live top	Angle to bottom of tree	Angle to bottom of Canopy	Height of tree total	Height of Canopy top wrt 0 degrees	Height of Canopy bottom	Light Exposure	% canopy missing	% dieback	Land Use
1	1	176	354	Quercus robur	N53.89721	W1.52950	92.5	20	52	52	-12	-6	29.85	25.5988	2.14905	4	5% - 10%	0	Park
1	2	177	260	Quercus robur	N53.89732	W1.52972	106.8	30	43	43	-2	0	29.0231	27.9755	1.04762	4	35% - 40%	0	Park
1	3	178	261	Quercus robur	N53.89739	W1.52956	76.6	21	51	51	-5	0	27.7701	25.9328	1.83726	4	20% - 25%	0	Park
1	4	179	0353 (and 262)	Quercus robur	N53.89731	W1.52954	87	30	45	45	10	10	24.7102	30	0	3	50% - 55%	0	Park
1	5	180	0264 3806	Quercus robur	N53.897	W1.52912	102	28.6	43	43	-6	1	29.6759	26.6699	3.5052	4	15% - 20%	0	Park
1	6	181 A		Quercus robur	N53.89714	W1.52896	16.5	12	33	33	-13	-4	10.5633	7.79289	1.9313	5	0	0	Park
1	7	181B	604	Quercus robur	N53.89718	W1.52896	38	22	33	33	-8	1	17.3789	14.287	3.47591	3	15% - 20%	0	Park
1	8	181c		Fagus sylvatica 'Purpurea'	N53.89719	W1.52897	58	30	36	36	-3	0	23.3685	21.7963	1.57223	2	0	0	Park
1	9	181D	356	Quercus robur	N53.89721	W1.52903	54.5	30	37.5	37.5	-5	12	25.6445	23.0198	9.00136	3	40% - 45%	0	Park
1	10	181 E		Fagus sylvatica	N53.89719	W1.52915	59	24	46	46	-3	-3	26.1105	24.8527	0	3	5% - 10%	0	Park
1	11	181 F		Fagus sylvatica	N53.89732	W1.52927	14	10	47	47	-12.5	-6	12.9406	10.7237	1.1659	4	0	0	Park
1	12	181(E1)		Quercus robur	N53.89730	W1.52913	39.4	25	42	42	-1.5	4	23.1647	22.5101	2.40282	3	40% - 45%	0	Park
1	13	181G		Fagus sylvatica	N53.89730	W1.52937	20	15.03	32	32	-12	-6	12.5865	9.39179	1.61501	5	0	0	Park
1	14	181I		Quercus robur	N53.89705	W1.52940	20	16	27	27	-5	0	9.55223	8.15241	1.39982	5	0	0	Park
1	15	181J		Fagus sylvatica	N53.89705	W1.52919	21	17	32	32	-5	0	12.1101	10.6228	1.48731	5	0	0	Park
1	16	181Z		Quercus robur	N53.89704	W1.52891	20	17	31	31	-2.5	-2.5	10.9569	10.2146	0	5	0	0	Park
1	17	182	B12 1207	Quercus robur	N53.89823	W1.52938	98.5	30	34	34	-6	0	23.3884	20.2353	3.15313	4	10% - 15%	0	Park
1	18	183	B 211	Quercus robur	N53.89820	W1.52952	83.1	30	33	33	-6	-4	22.6354	19.4822	1.05532	4	15% - 20%	0	Park
1	19	184	1303	Crataegus monogyna	N53.89823	W1.52968	39	15	15.5	15.5	-10.5	-4.5	6.93995	4.15987	1.59956	4	0	0	Park
1	20	185	209	Quercus robur	N53.89843	W1.52999	82.5	29	37	37	-5	-3	24.3902	21.8531	1.01735	5	0	0	Park
1	21	186	1905	Quercus robur	N53.89853	W1.52977	98.6	30	41	41	-4	-1	28.1764	26.0786	1.57415	4	25% - 30%	0	Park
1	22	189	218	Quercus robur	N53.89902	W1.52977	104	30	43	43	0	5	27.9755	27.9755	2.62466	4	35% - 40%	0	Park
1	23	190	349	Cedrus atlantica	N53.89879	W1.52941	80.3	25	48	48	-3	-1	29.0755	27.7653	0.873818	5	15% - 20%	0	Park
1	24	191	B07	Cedrus atlantica glauca	N53.89879	W1.52941	97	30	42	42	-2	-1.5	28.0597	27.0121	0.262045	5	10% - 15%	0	Park
1	25	192	none	Cedrus atlantica	N53.89856	W1.52935	91	24	44	44	-2.5	1	24.2244	23.1765	1.46678	5	20% - 25%	0	Park
1	26	193	1930	Quercus robur	N53.89847	W1.52895	119.4	30	38	38	-2	2	24.4862	23.4386	2.09525	4	20% - 25%	0	Park
1	27	194	1904	Quercus robur	N53.89860	W1.52892	94	27	37.5	37.5	-1	2	21.1891	20.7178	1.41415	4	0	0	Park
1	28	195	1924	Cedrus atlantica glauca	N53.89917	W1.52898	100	30	40	40	-1	0	25.6966	25.173	0.523652	5	10% - 15%	0	Park
1	29	196	347	Cedrus atlantica	N53.89927	W1.52856	99.1	26	43	43	-1.5	0.5	24.9262	24.2454	0.907733	4	30% - 35%	0	Park
1	30	197	345	Cedrus libani	N53.89939	W1.52839	99.3	29.7	41.5	41.5	-2	-1	27.3135	26.2763	0.518731	4	0	0	Park
1	31	198	1925*	Quercus coccinea	N53.89930	W1.52834	100	29.7	36	36	-2	1	22.6155	21.5783	1.55556	4	10% - 15%	0	Park
1	32	199	1295	Cedrus libani	N53.89950	W1.52811	105.3	29.7	45	45	-2	0.5	30.7371	29.7	1.29633	3	0	70% - 75%	Park
1	33	200	1923	Quercus robur	N53.89956	W1.52800	94	29.7	39	39	-2	-1	25.0877	24.0506	0.518731	4	10% - 15%	0	Park
1	34	202	B341	Cedrus libani	N53.89959	W1.52751	82.5	29.7	43	43	-1	0	28.2141	27.6957	0.518415	5	5% - 10%	0	Park
1	35	204	339	Cedrus libani	N53.89963	W1.52692	112.4	29.7	38	38	-1	1	23.7226	23.2042	1.03683	4	5% - 10%	5% - 10%	Park
1	36	205	338	Cedrus libani	N53.89962	W1.52667	80	27.7	44.5	44.5	-2	0.5	28.188	27.2207	1.20904	3	5% - 10%	0	Park
1	37	206	337	Cedrus libani	N53.89961	W1.52633	97	29.7	41	41	-2	-1	26.855	25.8178	0.518731	3	5% - 10%	10% - 15%	Park
1	38	207	335	Cedrus libani	N53.89964	W1.52596	120	30	52.5	52.5	-2.5	0	40.4066	39.0968	1.30983	3	5% - 10%	0	Park
1	39	208	333	Cedrus libani	N53.89962	W1.52596	125	30	44	44	-4	-2	31.0685	28.9707	1.05018	3	15% - 20%	5% - 10%	Park
1	40	209	334	Castanea sativa	N53.89928	W1.52596	102.5	29.7	30	30	-2.5	0	18.444	17.1473	1.29673	4	0	0	Park
1	41	210	336	Quercus dentata	N53.89945	W1.52569	70	25.7	35.5	35.5	-3.5	2	19.9035	18.3316	2.46934	5	15% - 20%	0	Park
1	42	211	331	Cedrus atlantica glauca	N53.89942	W1.52488	97.5	29.7	42	42	-1	0.5	27.2604	26.742	0.777603	4	20% - 25%	0	Park
1	43	212	330	Cedrus atlantica glauca	N53.89929	W1.52483	82	29.7	39	39	-2	-0.5	25.0877	24.0506	0.777959	3	15% - 20%	10% - 15%	Park
1	44	213	329	Castanea sativa	N53.89923	W1.52482	58	22.7	25	25	-1.5	3	11.1796	10.5852	1.78408	4	5% - 10%	0	Park
1	45	214	328	Fagus sylvatica	N53.89888	W1.52485	134	29.7	37	37	-1.5	1	23.1583	22.3806	1.29614	5	20% - 25%	0	Park
1	46	215	327	Quercus robur	N53.89856	W1.52495	87.5	29.7	35.5	35.5	-1	2.5	21.7032	21.1848	1.81515	4	15% - 20%	0	Park
1	47	216	326	Quercus robur	N53.89844	W1.52495	54	29.7	32	32	-6	0	21.6802	18.5586	3.1216	3	5% - 10%	0	Park
1	48	217	321	Quercus robur	N53.89833	W1.52466	47.5	27.2	36	36	-5	-1	22.1416	19.762	1.90491	4	35% - 40%	0	Park
1	49	218	322 (or 323?)	Castanea sativa	N53.89833	W1.52473	109.5	29.2	34	34	-6	-3	22.7647	19.6956	1.53874	2	40% - 45%	0	Park
1	50	219	323	Quercus robur	N53.89832	W1.52500	70.5	29.7	37	37	0.5	6.5	22.1214	22.3806	3.1247	3	10% - 15%	0	Park
1	51	220	B25	Quercus robur	N53.89828	W1.52515	84.5	29.7	37	37	-3	6	23.9371	22.3806	4.67811	3	5% - 10%	0	Park
1	52	221	none	Quercus robur	N53.89828	W1.52538	98	27.7	43	43	-1	6	26.3142	25.8307	3.39489	5	15% - 20%	0	Park
1	53	222	357	Quercus robur	N53.89793	W1.52633	84	29.7	37	37	2.5	2.5	21.0838	22.3806	0	5	15% - 20%	0	Park
1	54	224	none	Aesculus hippocastanum	N53.89740	W1.52651	80	29.7	53	53	0.5	3	39.154	39.4132	1.29732	3	5% - 10%	0	Park
1	55	225	none	Quercus robur	N53.89747	W1.52646	59	19.7	53	53	1	9.5	25.7989	26.1428	2.95278	3	15% - 20%	0	Park
1	56	226	none	Quercus robur	N53.89758	W1.52632	23	19.7	35	35	0.5	4.5	13.6222	13.7941	1.3785	3	0	0	Park
1	57	227	362	Castanea sativa	N53.89753	W1.52608	106	29.7	42.5	42.5	-3	0.5	28.7715	27.215	1.8157	4	15% - 20%	0	Park
1	58	228	363	Crataegus monogyna	N53.89754	W1.52599	21.5	22.7	26.5	26.5	-1	4	11.714	11.3178	1.98357	4	0	15% - 20%	Park
1	59	229	1301	Quercus robur	N53.89777	W1.52583	98	26.7	37	37	-4	2	21.9869	20.1199	2.79943	5	25% - 30%	0	Park
1	60	230	None	Quercus robur	N53.89761	W1.52565	24	19.7	30	30	-9	-5	14.494	11.3738	1.39665	4	15% - 20%	0	Park
1	61	231	None	Quercus robur	N53.89785	W1.52550	24.5	24.7	34	34	-1.5	4	17.3072	16.6604	2.37398	5	5% - 10%	0	Park
1	62	232	None	Quercus robur	N53.89808	W1.52507	22.5	22.7	30	30	0	4	13.1059	13.1059	1.58734	4	0	0	Park
1	63	233	358	Quercus robur	N53.89820	W1.52473	93.5	30	40	40	3	8	23.6008	25.173	2.64399	4	20% - 25%	0	Park
1	64	234	359	Quercus robur	N53.89801	W1.52486	119.5	44	38	38	1	3	33.6085	34.3766	1.53792	4	30% - 35%	0	Park
1	65	235	360	Quercus robur	N53.89799	W1.52507	116.3	46	31	31	-4	1	30.8562	27.6396	4.01957	4	20% - 25%	0	Park
1	66	239	none	Fagus sylvatica 'Purpurea'	N53.89856	W1.52776	94	30	31	31	-2.5	0.5	19.3356	18.0258	1.57163	5			Park
2	67	163	67	Quercus robur	N53.89649	W1.52904	91	30.6	34	34	-7	1	24.3972	20.64	4.29133	4	35% - 40%	0	Park
2	68	163A	68	Cedrus libani	N53.89647	W1.52893	78	30	46	46	-5	13	33.6906	31.0659	9.55071	4	0	0	Park
2	69	165A	80	Fagus sylvatica 'Purpurea'	N53.89631	W1.52832	54	28	36	36	-0.5	10	20.5875	20.3432	5.18151	3	10% - 15%	0	Park
2	70	165B	76	Cedrus libani	N53.89637	W1.52849	150.5	46	32.5	32.5	-2	3	30.9116	29.3052	4.01711	3	45% - 50%	0	Park
2	71	165C	77	Quercus robur	N53.89635	W1.52869	106	28.2567	35	35	-9.5	-2	24.5141	19.7856	3.74181	4	20% - 25%	0	Park
2	72	165D	78	Acer platanoides	N.53.89647	W1.52893	18	14.5024	21	21	-13	-3	8.91506	5.56693	2.5881	3	0	0	Park
2	73	163B	none	Acer palmatum	N53.89649	W1.52899	4	8.9507	9.5	9.5	-20	-19	4.75562	1.49783	0.175815	2	0	0	Park
2	74	163C	none	Rhododendron ponticum	N53.89647	W1.52885	12	17	13.5	13.5	-5	-2	5.56865	4.08134	0.893654	3	25% - 30%	0	Park
2	75	163D	none	Taxus baccata	N53.89653	W1.52839	70	30	29	29	-7	-7	20.3128	16.6293	0	3	20% - 25%	0	Park
2	76	164	3820	Acer pseudoplatanus	N53.89654	W1.52829	112	30	44	44	-3	5	30.5429	28.9707	4.19689	4	35% - 40%	0	Park
2	77	190	79	Tilia platyphyllos	N53.89635	W1.52911	84.5	41.1067	29	29	-10	-5	30.034	22.7858	3.65185	3	25% - 30%	0	Park
2	78	165E	none	Fraxinus angustifolia	N53.89626	W1.52905	14	23.6	20.5	20.5	-9	-4	12.5616	8.82368	2.0876	4	40% - 45%	0	Park
2	79	184	82	Acer platanoides	N53.89618	W1.52887	70	29.2	27	27	-10.5	-7	20.29	14.8781	1.82659	4	0	0	Park
2	80	166	81	Quercus robur	N53.89625	W1.52860	103	30	43	43	-2.5	8	29.2853	27.9755	5.52605	3	15% - 20%	0	Park
2	81	185	84	Abies alba	N53.89620	W1.52844	103	30	51	51	3	3	35.4747	37.0469	0	4	10% - 15%	0	Park
2	82	166B	B09	Morus nigra	N53.89618	W1.52832	12.5	15.7	15	15	-16	-16	8.7087	4.2068	0	3	30% - 35%	0	Park
2	83	170	3430, 0097	Quercus robur	N53.89596	W1.52801	79	23.6948	29	29	-18	-18	20.8332	13.1343	0	4	30% - 35%	0	Park
2	84	170A	95	Sorbus intermedia	N53.89590	W1.52814	35.5	27	41	41	6	9	20.6329	23.4707	1.43857	2	80% - 85%	0	Park
2	85	170B	90	Quercus rubra	N53.89587	W1.52832	89	28.5	37	37	-7	-4	24.9757	21.4763	1.50645	4	5% - 10%	0	Park
2	86	163I	none	Rhododendron ponticum	N53.89685	W1.52857	12	20	12.5	12.5	-1.5	-1.5	4.95761	4.43389	0	1	60% - 65%	0	Park
2	87	163J	66	Cupressocyparis leylandii	N53.89687	W1.52869	26.5	29	29	29	-4.5	-1	18.3573	16.075	1.77615	4	0	40% - 45%	Park
2	88	163K	none	Rhododendron ponticum	N53.89680	W1.52866	2	12	10	10	-12	-6	4.6666	2.11592	1.28943	2	0	90% - 95%	Park
2	89	163M	none	Acer davidii	N53.89675	W1.52891	6	11	19	19	-12	-3	6.12573	3.7876	1.76164	5	0	0	Park
2	90	163H1	65	Cupressocyparis leylandii	53.8969	W1.52867	21	29	28	28	-2.5	1	16.6857	15.4196	1.77236	4	0	85% - 90%	Park
2	91	163q	none	Quercus robur	N53.89658	W1.52899	92	29	40	40	-4.5	7	26.6162	24.3339	5.8431	4	20% - 25%	0	Park
2	92	163E	74	Cupressocyparis leylandii	N53.89668	W1.52868	154	28.7879	42	42	-8	-8	29.9667	25.9208	0	4	65% - 70%	0	Park
2	93	163O	72	Acer platanoides	N53.89672	W1.52889	53	28	26	26	-9	-6	18.0913	13.6565	1.49185	4	10% - 15%	0	Park
2	94	163G	63	Ilex aquifolium	N53.89686	W1.52858	38	28	30	30	-0.5	3.5	16.4102	16.1658	1.95691	4	0	20% - 25%	Park
2	95	163H	64	Cupressocyparis leylandii	N53.89656	W1.52863	38	25	39	39	-1	4	20.681	20.2446	2.18455	4	0	5% - 10%	Park
2	96	168A	103	Betula pendula	N53.89571	W1.52850	36.5	27	45	45	-2	3	27.9429	27	2.35787	3	10% - 15%	0	Park
2	97	168B	none	Juglans nigra	N53.89569	W1.52865	11.5	23	22	22	-6	3	11.71	9.2926	3.62278	3	5% - 10%	0	Park
2	98	168C	none	Prunus pissardii	N53.89563	W1.52869	18.5	16.6	26.5	26.5	-8	1	10.6094	8.27645	2.62273	4	25% - 30%	20% - 25%	Park
2	99	173	108	Fagus sylvatica	N53.89544	W1.52830	96.5	34	30	30	-9	0	25.015	19.6299	5.38507	4	5% - 10%	0	Park
2	100	173A	109	Betula pendula	N53.89539	W1.52824	22.5	21	33.5	33.5	-7	6	16.4781	13.8996	4.78566	2	15% - 20%	0	Park
2	101	174	110	Aesculus hippocastanum	N53.89538	W1.52818	98	28.4	39	39	-6	-3	25.9828	22.9979	1.49658	3	15% - 20%	0	Park
2	102	175	111	Tilia platyphyllos	N53.89536	W1.52808	73.5	45	40	40	3	6	35.4011	37.7595	2.37134	3	40% - 45%	0	Park
2	103	172	112	Castanea sativa	N53.89548	W1.52806	102	30.2	40	40	-5.5	1	28.2487	25.3408	3.43507	3	30% - 35%	0	Park
2	104	189	114	Quercus robur	N53.89564	W1.52818	45	28.7	39	39	-2.5	-0.5	24.4939	23.2408	1.00261	3	30% - 35%	0	Park
2	105	188	115	Fagus sylvatica	N53.89569	W1.52810	74.5	30	40	40	-0.5	2	25.4348	25.173	1.30943	3	15% - 20%	0	Park
2	106	187	102	Quercus rubra	N53.89582	W1.52819	75.5	29	45	45	-4	5	31.0279	29	4.56505	4	5% - 10%	0	Park
2	107	187A	100	Sorbus aucuparia	N53.89586	W1.52812	16	20	38	38	-3	3	16.6739	15.6257	2.09631	1	10% - 15%	5% - 10%	Park
2	108	187B	99	Sorbus aucuparia	N53.89588	W1.527804	14	14.3	38.5	38.5	-17	-9	15.7467	11.3747	2.10705	1	5% - 10%	20% - 25%	Park
2	109	166C	none	Acer palmatum	N53.89618	W1.52823	10	11.6	10	10	-16.5	-16.5	5.48147	2.04539	0	3	35% - 40%	0	Park
2	110	186	1310	Sequoiadendron giganteum	N53.89611	W1.52824	145.5	45	36	36	-3	2	35.0528	32.6944	3.92978	5	20% - 25%	0	Park
2	111	166E	1311	Betula pendula	N53.89604	W1.52817	26	23.7	13.5	13.5	-11	-11	10.2967	5.68987	0	3	25% - 30%	0	Park
2	112	166F	85	Betula pendula	N53.89611	W1.52836	29	20	18	18	-1.5	-1.5	7.02211	6.49839	0	4	25% - 30%	5% - 10%	Park
2	113	166G	none	Acer palmatum	N53.89613	W1.52895	10.5	17	13.5	13.5	-4	-4	5.27009	4.08134	0	3	20% - 25%	0	Park
2	114	166H	none	Acer cappadocicum	N53.89605	W1.52889	18	25.5	28	28	-5	4	15.7896	13.5586	4.01409	4	10% - 15%	0	Park
2	115	166I	none	Fraxinus excelsior	N53.89594	W1.52883	50	27.2	32	32	-6	14	19.8553	16.9964	9.64056	3	0	0	Park
2	116	168	98	Quercus robur	N53.89580	W1.52877	99	50.2	23	23	-8	-0.5	28.3638	21.3086	6.61706	3	35% - 40%	0	Park
2	117	167	97	Quercus robur	N53.89582	W1.52870	113.5	43	30	30	-9	7	31.6366	24.8261	12.0903	3	40% - 45%	0	Park
2	118	167A	96	Quercus rubra	N53.89582	W1.52839	84.5	42.9	26.5	26.5	-10	-3.5	28.9536	21.3892	4.94055	3	15% - 20%	0	Park
2	119	166J	none	Acer palmatum	N53.89593	W1.52854	9.5	15	12	12	-6	-4	4.76491	3.18835	0.527661	5	5% - 10%	0	Park
2	120	166k1	none	Rhododendron ponticum	N53.89599	W1.52866	5.5	23.4	14	14	-6	-6	8.29371	5.83428	0	2	60% - 65%	0	Park
2	121	166K2	none	Rhododendron ponticum	N53.89599	W1.52866	14.5	23.4	14	14	-6	-4	8.29371	5.83428	0.823152	2	60% - 65%	0	Park
2	122	166K3	none	Rhododendron ponticum	N53.89599	W1.52866	5	23.4	14	14	-6	-4	8.29371	5.83428	0.823152	2	60% - 65%	0	Park
2	123	166K4	none	Rhododendron ponticum	N53.89599	W1.52866	9.5	23.4	14	14	-6	-4	8.29371	5.83428	0.823152	2	60% - 65%	0	Park

## Sheet: North Front iTrees Output
Tree ID	Species Name	DBH		Structural Value	Carbon Storage		Gross Carbon Sequestration		Avoided Runoff		Pollution Removal		Energy Savings	Total Annual Benefits
		(in)		(£)	(lb)	(£)	(lb/yr)	(£/yr)	(ft³/yr)	(£/yr)	(oz/yr)	(£/yr)	(£/yr)	(£/yr)
11	European beech	5.5	13.97	85.44	92.6	2.69	15.6	0.45	38.6	0.88	18.7	3.52		4.85
6	English oak	6.5	16.51	118.68	104.1	3.02	16	0.47	21.2	0.48	10.3	1.93	-12.65	-9.77
14	English oak	7.9	20.066	174.38	164.6	4.78	20.9	0.61	24.8	0.57	12	2.25	-5.86	-2.44
16	English oak	7.9	20.066	174.38	167.2	4.85	21.1	0.61	31.9	0.73	15.5	2.91	-13.24	-8.99
13	European beech	7.9	20.066	174.38	208.6	6.06	24.3	0.71	43.8	1	21.3	3.99		5.69
15	European beech	8.3	21.082	212.08	233.2	6.77	25.8	0.75	45.7	1.04	22.1	4.15	-18.89	-12.94
58	hawthorn spp	8.5	21.59	188.35	185.8	5.39	17.2	0.5	35.4	0.81	17.2	3.22		4.53
62	English oak	8.9	22.606	286.57	227.6	6.61	25.4	0.74	31.6	0.72	15.3	2.88		4.34
56	English oak	9.1	23.114	312.54	241.3	7	14.6	0.42	26.6	0.61	12.9	2.42		3.46
60	English oak	9.4	23.876	366.2	269.9	7.84	28.1	0.82	20.6	0.47	10	1.87		3.16
61	English oak	9.6	24.384	393.89	291.2	8.45	29.6	0.86	21.1	0.48	10.2	1.92		3.26
7	English oak	15	38.1	1357.15	845.2	24.54	30.8	0.89	14	0.32	6.8	1.28	9.18	11.67
12	English oak	15.5	39.37	1480.86	961	27.9	33.5	0.97	11.9	0.27	5.8	1.09	8.62	10.95
19	Oneseed hawthorn	17.3	43.942	1698.61	981.9	28.5	55	1.6	17.7	0.4	8.6	1.61		3.61
48	English oak	18.7	47.498	2284.46	1500.9	43.57	78.2	2.27	51.1	1.17	24.8	4.65		8.09
47	English oak	21.3	54.102	3037.67	2045.5	59.38	52.4	1.52	58.3	1.33	28.3	5.3		8.16
9	English oak	21.5	54.61	3099.6	2139.1	62.1	54	1.57	40	0.92	19.4	3.64	8.62	14.75
8	Copper beech	22.8	57.912	3549.13	2359.1	68.49	51.9	1.51	58.3	1.33	28.3	5.31	9.27	17.41
44	Sweet chestnut	22.8	57.912	3549.13	1973.7	57.3	83	2.41	35	0.8	17	3.18		6.39
55	English oak	23.2	58.928	3682.7	2596.1	75.36	60.7	1.76	31.4	0.72	15.2	2.86		5.34
10	European beech	23.2	58.928	3682.7	2452.8	71.2	53	1.54	53.3	1.22	25.8	4.84	9.08	16.69
41	Daimio oak	27.6	70.104	5302.7	3818.8	110.86	135.9	3.94	57.7	1.32	28	5.25		10.52
50	English oak	27.8	70.612	5382.9	3929.8	114.08	77.4	2.25	67.2	1.54	32.6	6.11		9.9
3	English oak	30.2	76.708	6256.7	4946.8	143.6	159.6	4.63	49.2	1.12	23.9	4.48		10.24
36	Cedar of lebanon	31.5	80.01	6867.37	2417.1	70.17	35	1.02	99.5	2.27	48.2	9.05		12.34
54	Horse chestnut	31.5	80.01	4593.66	4735.2	137.46	78.9	2.29	110.1	2.52	53.4	10.02		14.83
23	Atlas cedar	31.6	80.264	6920.71	2532.7	73.52	63.4	1.84	141.4	3.23	68.5	12.86		17.93
43	Blue atlas cedar	32.3	82.042	6282.55	2429.5	70.53	30.2	0.88	91.9	2.1	44.5	8.36		11.33
34	Cedar of lebanon	32.5	82.55	7309.2	2654.3	77.06	64.8	1.88	149.9	3.42	72.6	13.63		18.94
20	English oak	32.5	82.55	7309.2	5836.1	169.42	175.6	5.1	66.3	1.51	32.1	6.03		12.64
18	English oak	32.7	83.058	7414.34	5891.5	171.03	176.4	5.12	60.1	1.37	29.1	5.46		11.96
53	English oak	33.1	84.074	7571.38	6007.3	174.39	178.2	5.17	68.5	1.57	33.2	6.23		12.97
51	English oak	33.3	84.582	7658.29	6174.2	179.24	101.6	2.95	39.1	0.89	18.9	3.55		7.4
4	English oak	34.3	87.122	8089.17	6654.8	193.19	106.3	3.09	15.7	0.36	7.6	1.43		4.88
46	English oak	34.4	87.376	8174.61	6658.6	193.3	189.6	5.5	58.1	1.33	28.2	5.29		12.12
25	Atlas cedar	35.8	90.932	8765.91	3173.4	92.12	69.6	2.02	217	4.96	105.2	19.74		26.72
1	English oak	36.4	92.456	9015.68	7901.5	229.38	211.3	6.13	39.6	0.9	19.2	3.6		10.64
63	English oak	36.8	93.472	9180.97	7901.1	229.37	210.3	6.11	67.6	1.54	32.8	6.15		13.8
66	Copper beech	37	93.98	8522.19	7086.7	205.73	157.5	4.57	194.6	4.45	94.3	17.7		26.72
27	English oak	37	93.98	9263.25	7922.3	229.98	210.3	6.11	85	1.94	41.2	7.73		15.78
33	English oak	37	93.98	9263.25	8056.7	233.89	213	6.18	87.6	2	42.5	7.97		16.16
24	Blue atlas cedar	38.2	97.028	9751.82	3764.6	109.29	78.4	2.28	225.1	5.14	109.1	20.48		27.9
37	Cedar of lebanon	38.2	97.028	8484.08	3623.1	105.18	37.7	1.09	171.9	3.93	83.3	15.63		20.66
42	Blue atlas cedar	38.4	97.536	9832.39	3598.3	104.46	78.2	2.27	125.4	2.87	60.8	11.41		16.54
52	English oak	38.6	98.044	9912.73	8967.2	260.32	227.3	6.6	73.4	1.68	35.6	6.67		14.95
59	English oak	38.6	98.044	9912.73	8807	255.67	224.2	6.51	28.8	0.66	14	2.62		9.79
17	English oak	38.8	98.552	9992.81	8970.6	260.42	226.9	6.59	47	1.07	22.8	4.27		11.93
21	English oak	38.8	98.552	10008.8	9173.5	266.31	230.7	6.7	68.5	1.57	33.2	6.23		14.5
29	Atlas cedar	39	99.06	10088.6	3646.5	105.86	77.6	2.25	146.4	3.35	71	13.31		18.91
30	Cedar of lebanon	39.1	99.314	10120.5	3918.7	113.76	79.9	2.32	234.9	5.37	113.9	21.37		29.06
28	Blue atlas cedar	39.4	100	10231.6	3741.2	108.61	79.2	2.3	141.7	3.24	68.7	12.89		18.42
31	Scarlet oak	39.4	100	10231.6	8920.3	258.96	222.3	6.45	86.4	1.97	41.9	7.86		16.29
5	English oak	40.2	102.108	10546.6	10026	291.05	243.1	7.06	66.4	1.52	32.2	6.04	8.52	23.13
40	Sweet chestnut	40.4	102.616	10624.8	7989.4	231.93	185.2	5.38	120.3	2.75	58.3	10.94		19.07
22	English oak	40.9	103.886	10857.7	10404.1	302.03	197.7	5.74	71.4	1.63	34.6	6.49		13.86
32	Cedar of lebanon	41.5	105.41	2985.62	4469	129.73	13.4	0.39	182.3	4.17	88.4	16.58		21.14
57	Sweet chestnut	41.7	105.918	11164.9	8894.1	258.19	180.3	5.23	67.9	1.55	32.9	6.17		12.96
2	English oak	42	106.68	11286.7	10975.2	318.61	181.5	5.27	51.3	1.17	24.8	4.66		11.1
49	Sweet chestnut	43.1	109.474	11693.2	9314.5	270.4	91.9	2.67	36.5	0.83	17.7	3.32		6.83
35	Cedar of lebanon	44.3	112.522	11152.1	4833	140.3	82	2.38	266.1	6.08	129	24.2		32.66
65	English oak	45.8	116.332	12685.4	12373.3	359.2	129.7	3.77	100.5	2.3	48.7	9.14		15.2
26	English oak	47	119.38	13122.7	12323.1	357.74	85.9	2.49	101.4	2.32	49.2	9.23		14.04
64	English oak	47	119.38	13136.7	12822.3	372.23	93.7	2.72	98.3	2.25	47.6	8.94		13.91
38	Cedar of lebanon	47.2	119.888	13206.3	6382.2	185.27	63.7	1.85	157.1	3.59	76.2	14.29		19.73
39	cedar spp	49.2	124.968	12778	6274.5	182.15	56.3	1.64	148.7	3.4	72.1	13.52		18.56
45	European beech	52.8	134.112	15056.8	13227.7	384	22	0.64	164.7	3.76	79.8	14.98		19.38
total				447918	324209	9411.79	6624.8	192.35	5460.8	124.78	2647.3	496.7	2.65	816.55
Carbon storage and gross carbon sequestration value is calculated based on the price of £0.02903 per pound Avoided runoff value is calculated by the price £0.023/ft³. The user-designated weather station reported 9.8 inches of total annual precipitation. Energy saving value is calculated based on the prices of £149.19 per MWH and £14.09 per MBTU. Trees less than 10ft/3m tall or further than 60ft/1…

## Sheet: West Garden iTrees Output
Tree ID	Species Name	DBH		Structural Value	Carbon Storage		Gross Carbon Sequestration		Avoided Runoff		Pollution Removal		Energy Savings	Total Annual Benefits
		(in)		(£)	(lb)	(£)	(lb/yr)	(£/yr)	(ft³/yr)	(£/yr)	(oz/yr)	(£/yr)	(£/yr)	(£/yr)
122	rhododendron spp	2	5.08	66.15	9.5	0.28	1.6	0.05	1.7	0.04	0.8	0.15		0.24
89	Pere david's maple	2.4	6.096	75	12.1	0.35	4.7	0.14	6.2	0.14	3	0.56		0.84
73	Japanese maple	2.6	6.604	75	14.5	0.42	2.7	0.08	8.6	0.2	4.2	0.79		1.06
120	rhododendron spp	2.6	6.604	66.15	15.2	0.44	2.4	0.07	1.7	0.04	0.8	0.15		0.26
88	rhododendron spp	3.1	7.874	37.71	23.1	0.67	1.5	0.04	3.5	0.08	1.7	0.32		0.45
123	rhododendron spp	3.7	9.398	66.15	30.1	0.87	3.8	0.11	1.8	0.04	0.9	0.16		0.31
97	Black walnut	4.5	11.43	75	42.9	1.24	5	0.15	14.9	0.34	7.2	1.36		1.85
113	Japanese maple	4.7	11.938	75	50.8	1.47	5.4	0.16	10.1	0.23	4.9	0.92		1.31
119	Japanese maple	4.7	11.938	75	49.5	1.44	9.7	0.28	13.3	0.3	6.4	1.21		1.8
86	rhododendron spp	4.7	11.938	66.15	45.6	1.32	3.9	0.11	1	0.02	0.5	0.1		0.23
108	European mountain ash	5.5	13.97	65.79	70.8	2.05	4	0.12	4.4	0.1	2.1	0.4		0.62
78	Narrow-leafed ash	5.5	13.97	85.44	69.9	2.03	11	0.32	11.8	0.27	5.7	1.08		1.67
121	rhododendron spp	5.9	14.986	85.55	85.4	2.48	6.9	0.2	4.5	0.1	2.2	0.41		0.71
109	Japanese maple	6	15.24	102.88	89.3	2.59	7.4	0.21	5.7	0.13	2.7	0.52		0.86
107	European mountain ash	6.3	16.002	102.67	97.4	2.83	5.8	0.17	4	0.09	1.9	0.36		0.63
72	Norway maple	7.1	18.034	141.24	137.6	4	9.5	0.28	23.4	0.53	11.3	2.14		2.95
74	rhododendron spp	7.3	18.542	133.14	139.9	4.06	9.1	0.27	7.2	0.17	3.5	0.66		1.09
100	European white birch	8.9	22.606	286.57	234.2	6.8	14.5	0.42	10.8	0.25	5.2	0.98		1.65
111	European white birch	10.2	25.908	480.37	334.2	9.7	17.9	0.52	12.8	0.29	6.2	1.17		1.98
87	Leyland cypress	10.4	26.416	226.87	224.2	6.51	8.7	0.25	22.4	0.51	10.9	2.05		2.81
98	Purpleleaf plum	10.9	27.686	399.48	388.4	11.28	26.7	0.77	14.3	0.33	6.9	1.3		2.4
112	European white birch	11.4	28.956	615.24	437.3	12.69	34.6	1	14.2	0.33	6.9	1.3		2.63
82	Black mulberry	11.7	29.718	647.84	388.2	11.27	17.8	0.52	12.1	0.28	5.9	1.11		1.9
96	European white birch	14.4	36.576	1229.57	770.6	22.37	29.3	0.85	24.2	0.55	11.7	2.21		3.61
90	Leyland cypress	14.6	37.084	63.2	394.5	11.45	1.5	0.04	16.6	0.38	8	1.51		1.94
94	English holly	15	38.1	1045.01	761.2	22.1	36	1.05	15.1	0.35	7.3	1.38		2.77
95	Leyland cypress	15	38.1	880.37	434	12.6	22	0.64	11.1	0.25	5.4	1.01		1.9
104	English oak	17.7	44.958	2020.45	1336.4	38.79	40.8	1.18	29.4	0.67	14.3	2.69		4.55
115	European ash	19.7	50.038	2562.74	1198.1	34.78	29.9	0.87	59.5	1.36	28.8	5.44		7.66
114	Cappadocian maple	19.8	50.292	2610.12	1431.3	41.55	63.6	1.85	39.7	0.91	19.2	3.63		6.38
93	Norway maple	20.9	53.086	2915.51	1637	47.52	68.8	2	60.7	1.39	29.4	5.54		8.93
69	Copper beech	21.3	54.102	3037.67	2004.7	58.2	47.4	1.38	92	2.1	44.6	8.4		11.88
84	Swedish whitebeam	22.9	58.166	3571.39	2076.1	60.27	48.1	1.4	5.6	0.13	2.7	0.51		2.04
75	English yew	27.6	70.104	5302.7	1645.3	47.76	27.2	0.79	77.6	1.77	37.6	7.08		9.64
79	Norway maple	27.6	70.104	5302.7	3059.7	88.82	97.8	2.84	102.2	2.34	49.5	9.34		14.51
102	Bigleaf linden	28.9	73.406	5876.1	2225.3	64.6	39.9	1.16	37.5	0.86	18.2	3.43		5.44
105	European beech	29.3	74.422	6045.06	4172.8	121.14	71.3	2.07	63.8	1.46	30.9	5.82		9.35
106	Northern red oak	29.7	75.438	6216.31	4202.3	121.99	135.2	3.93	72.5	1.66	35.1	6.62		12.2
68	Cedar of lebanon	30.7	77.978	6509.52	2330.7	67.66	64.5	1.87	27.4	0.63	13.3	2.5		5
83	English oak	31.1	78.994	6688.93	5160.2	149.8	162.7	4.72	46.5	1.06	22.5	4.24		10.03
77	Bigleaf linden	33.3	84.582	7658.29	3091.8	89.75	48.2	1.4	43.8	1	21.2	4		6.4
118	Northern red oak	33.3	84.582	7658.29	5524.8	160.38	88.8	2.58	63	1.44	30.5	5.75		9.77
85	Northern red oak	35	88.9	8429.49	6267	181.93	170.8	4.96	106.2	2.43	51.5	9.7		17.09
67	English oak	35.8	90.932	8765.91	7419.1	215.38	202.7	5.88	51.8	1.18	25.1	4.73		11.8
91	English oak	36.2	91.948	8932.67	7692.8	223.32	207.4	6.02	66.7	1.53	32.3	6.1		13.64
99	European beech	38	96.52	9671	7523.3	218.4	177.1	5.14	61.2	1.4	29.7	5.59		12.13
101	Horse chestnut	38.6	98.044	6603.6	7349.7	213.36	101.5	2.95	97.5	2.23	47.2	8.9		14.08
116	English oak	39	99.06	10072.7	9272.2	269.17	130	3.77	23.2	0.53	11.2	2.12		6.42
103	Sweet chestnut	40.2	102.108	10546.6	8142	236.36	107.9	3.13	35.8	0.82	17.3	3.27		7.22
80	English oak	40.6	103.124	10702.7	10250.8	297.58	124.6	3.62	37.2	0.85	18	3.39		7.86
81	European silver fir	40.6	103.124	7124.95	3371.6	97.88	63.1	1.83	116.1	2.65	56.3	10.61		15.09
71	English oak	41.7	105.918	11164.9	10638.9	308.85	179.5	5.21	99.2	2.27	48.1	9.06		16.54
76	Sycamore maple	44.1	112.014	12063.2	9168.1	266.15	182.7	5.3	90.2	2.06	43.7	8.24		15.6
117	English oak	44.7	113.538	12282.3	12025.9	349.11	87.1	2.53	34.8	0.8	16.9	3.18		6.5
110	Giant sequoia	57.3	145.542	12867.7	8745.3	253.87	136.1	3.95	25.3	0.58	12.3	2.31		6.84
70	Cedar of lebanon	59.3	150.622	16992.7	9138.9	265.3	76.5	2.22	121.3	2.77	58.8	11.08		16.07
92	Leyland cypress	60.6	153.924	11524.9	9493.1	275.58	139.1	4.04	119.9	2.74	58.1	10.95		17.73
total				238990	172946	5020.56	3423.7	99.41	2185	49.96	1058.5	199.53		348.86
